# Supplementary material for: Terminal vs. bridging coordination of CO and NO ligands after decarbonylation of [W2Cp2(μ-PR2)(CO)3(NO)] complexes (R = Ph, Cy). An experimental and computational study
Source: Royal Society of Chemistry journal article supplement (doi:10.1039/c7dt02243c), 2017-01-01
Supplement: c7dt02243c2.pdf [file c7dt02243c2.pdf]

## Electronic Supplementary Information

### **Terminal vs. Bridging Coordination of CO and NO Ligands after Decarbonylation of $[W_2Cp_2(\mu-PR_2)(CO)_3(NO)]$ Complexes (R = Ph, Cy). An Experimental and Computational Study.**

M. Angeles Alvarez, M. Esther García, Daniel García-Vivó,\* M. Teresa Rueda, Miguel  
A. Ruiz,\* Adrián Toyos and M. Fernanda Vega.

*Departamento de Química Orgánica e Inorgánica / IUQOEM, Universidad de  
Oviedo, E-33071 Oviedo, Spain.*

**Table S1.** DFT optimized structures for different isomers of compound **3b** (B3LYP // LANL2DZ, 6-31G\*).

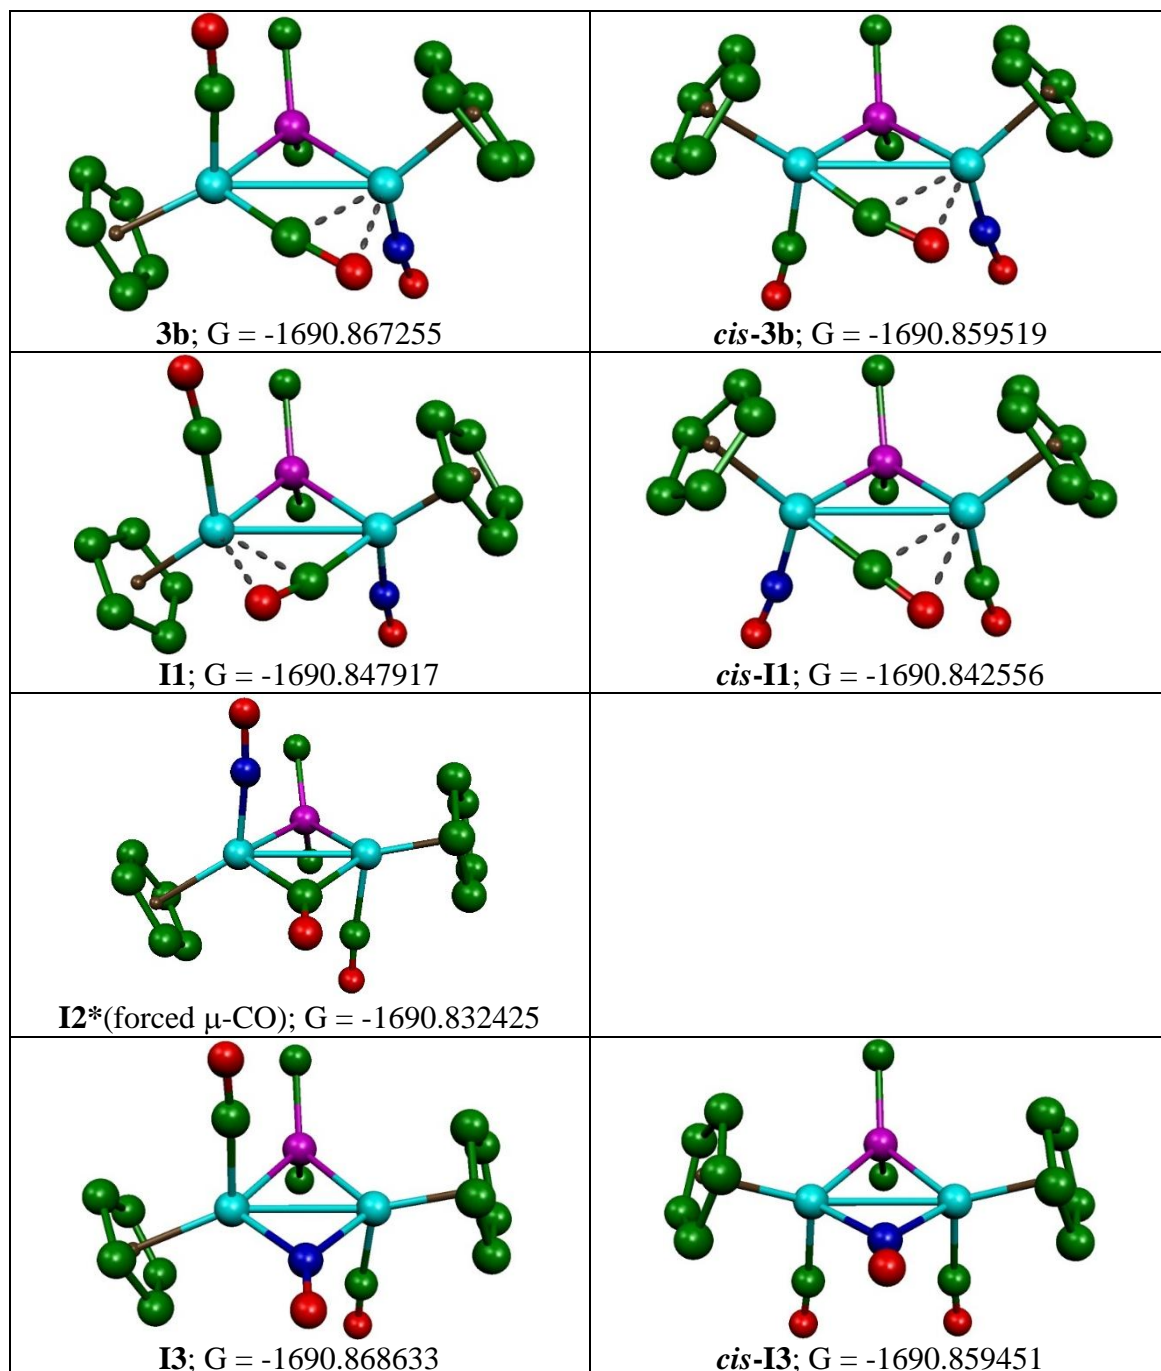

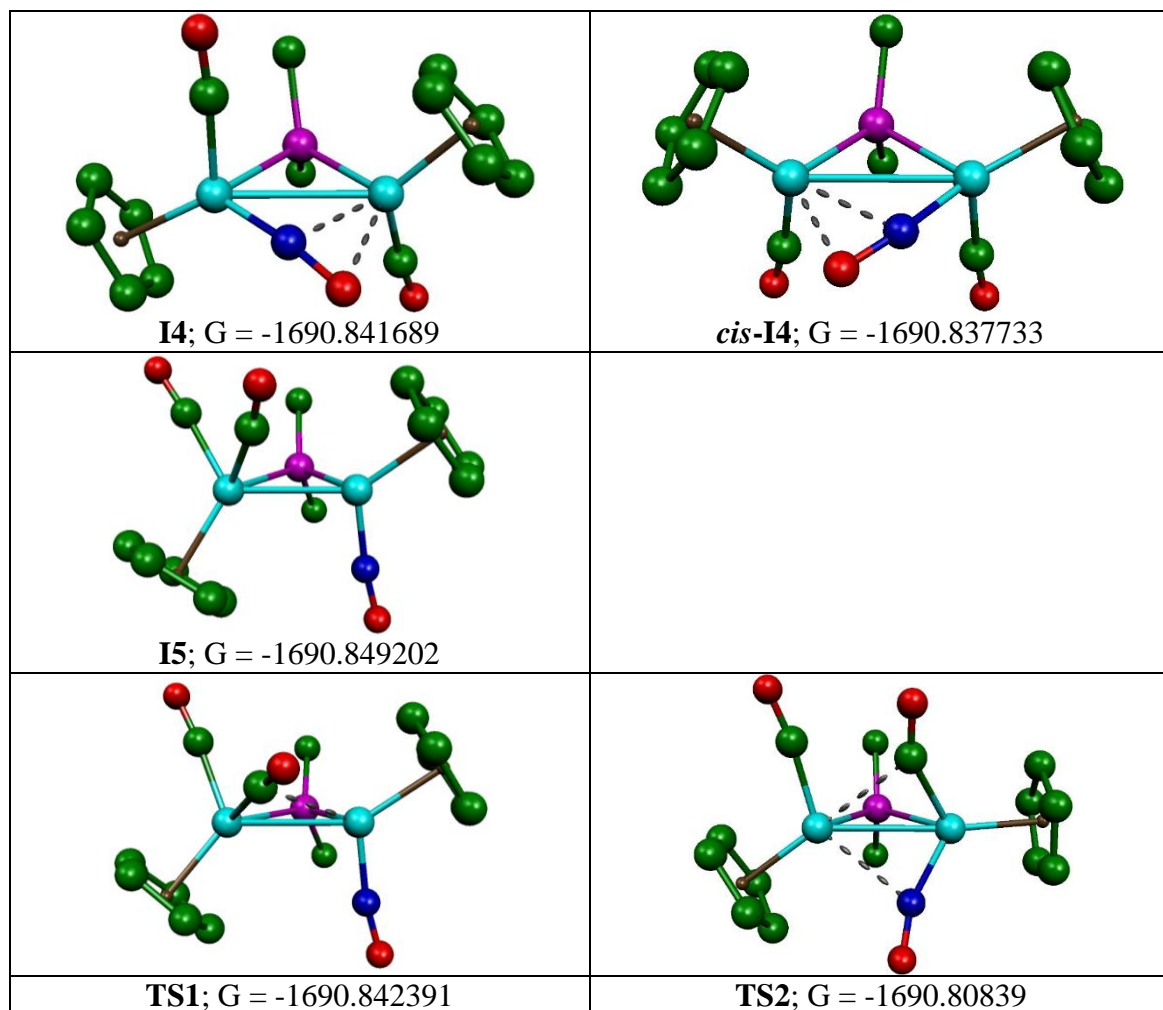

**Table S2.** Relative Gibbs Free Energies (kJ/mol) of DFT-optimized structures (B3LYP // LANL2DZ, 6-31G\*).

|            | <b>3b</b> | <i>cis-3b</i> | <b>I1</b> | <i>cis-I1</i> | <b>I2*</b> | <b>I3</b> | <i>cis-I3</i> | <b>I4</b> | <i>cis-I4</i> | <b>I5</b> | <b>TS1</b> | <b>TS2</b> |
|------------|-----------|---------------|-----------|---------------|------------|-----------|---------------|-----------|---------------|-----------|------------|------------|
| $\Delta G$ | 3.6       | 23.9          | 54.4      | 68.5          | 95.1       | 0         | 24.1          | 70.7      | 81.1          | 51.0      | 68.8       | 158.2      |

**Table S3.** DFT-optimized structures of compounds **3b** and **I3** with different functionals.

| <b>3b</b>                                                                                                                  | <b>I3</b>                                                                                                                   |
|----------------------------------------------------------------------------------------------------------------------------|-----------------------------------------------------------------------------------------------------------------------------|
| 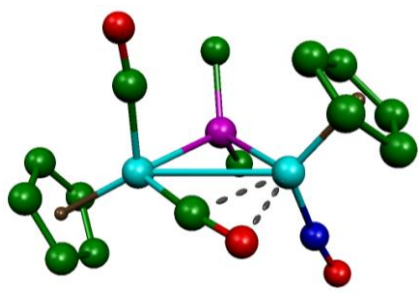 <p><b>BP86; G = -1691.090487</b></p>     |  <p><b>BP86; G = -1691.090414</b></p>     |
|  <p><b>M06-2X; G = -1689.905297</b></p>  |  <p><b>M06-2X; G = -1689.902124</b></p>  |
|  <p><b>ωB97XD; G = -1690.499926</b></p> |  <p><b>ωB97XD; G = -1690.500702</b></p> |

**Table S4.** Relative Gibbs Free Energies of compounds **3b** and **I3** (kJ/mol) computed with different DFT functionals.

|                                | <b>BP86</b> | <b>M06-2X</b> | <b>ωB97XD</b> |
|--------------------------------|-------------|---------------|---------------|
| $\Delta G_{I3 \rightarrow 3a}$ | -0.2        | -8.3          | 2.0           |

**Table S5.** DFT-optimized structures of compounds **3b** and **I2** ( $\omega$ B97XD // SDD, 6-31G\*).

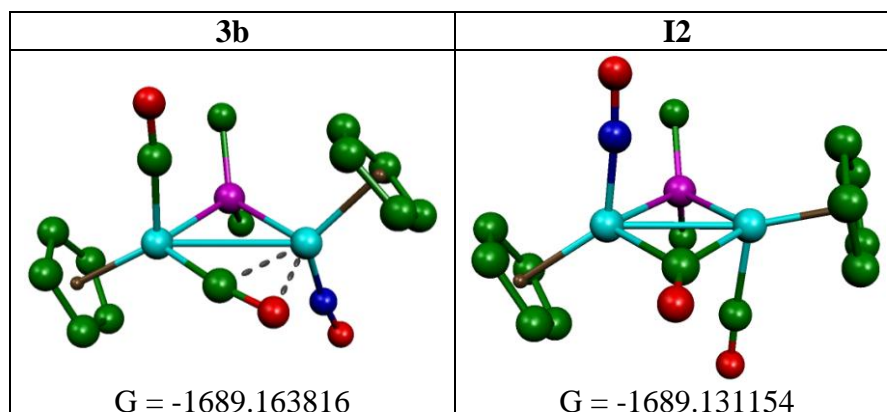

**Table S6.** Relative energies of compounds **3b** and **I2** ( $\text{kJ}\cdot\text{mol}^{-1}$ ) ( $\omega$ B97XD // SDD, 6-31G\*).

|                                |      |
|--------------------------------|------|
| $\Delta G_{3b \rightarrow I2}$ | 85.8 |
|--------------------------------|------|

**Table S7.** DFT-calculated stretching wavenumbers  $\nu(\text{cm}^{-1})$  and relative intensities for isomers **3b** and **I3** (B3LYP // LANL2DZ, 6-31G\*). The experimental spectrum of **3b** in dichloromethane solution is shown below.

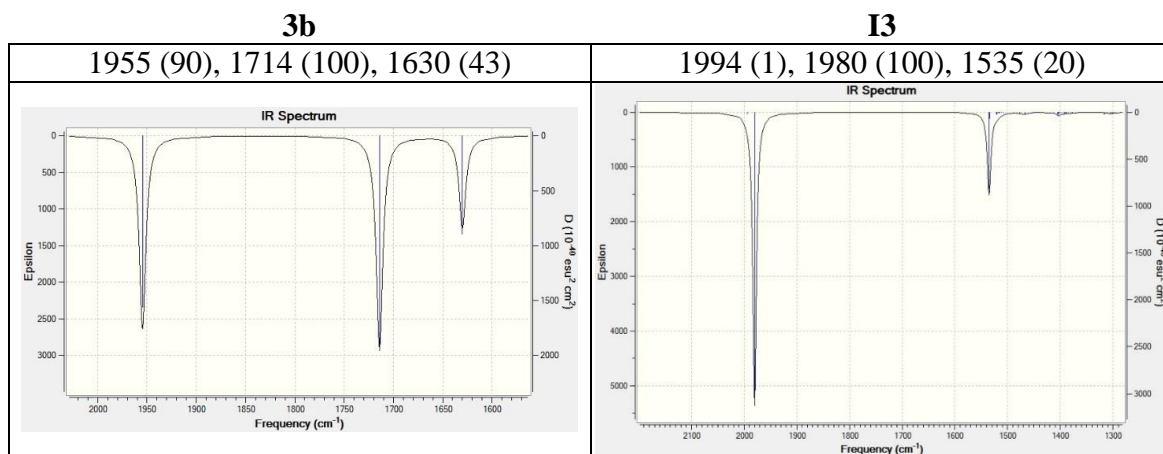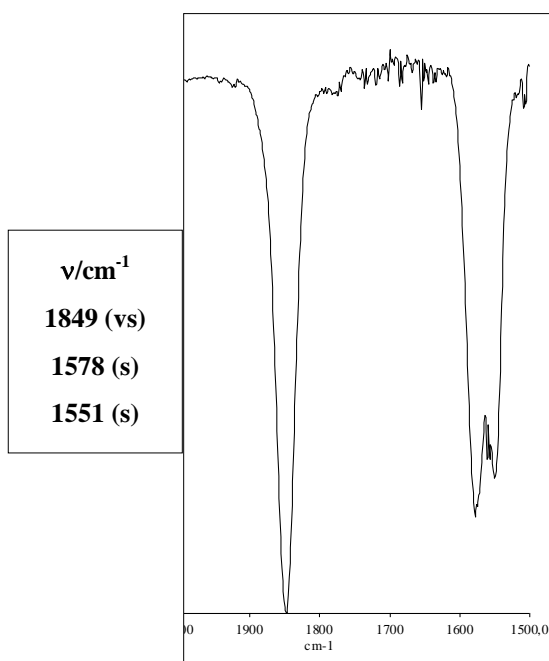

## Reference 49

Frisch, M. J.; Trucks, G. W.; Schlegel, H. B.; Scuseria, G. E.; Robb, M. A.; Cheeseman, J. R.; Montgomery, Jr., J. A.; Vreven, T.; Kudin, K. N.; Burant, J. C.; Millam, J. M.; Iyengar, S. S.; Tomasi, J.; Barone, V.; Mennucci, B.; Cossi, M.; Scalmani, G.; Rega, N.; Petersson, G. A.; Nakatsuji, H.; Hada, M.; Ehara, M.; Toyota, K.; Fukuda, R.; Hasegawa, J.; Ishida, M.; Nakajima, T.; Honda, Y.; Kitao, O.; Nakai, H.; Klene, M.; Li, X.; Knox, J. E.; Hratchian, H. P.; Cross, J. B.; Bakken, V.; Adamo, C.; Jaramillo, J.; Gomperts, R.; Stratmann, R. E.; Yazyev, O.; Austin, A. J.; Cammi, R.; Pomelli, C.; Ochterski, J. W.; Ayala, P. Y.; Morokuma, K.; Voth, G. A.; Salvador, P.; Dannenberg, J. J.; Zakrzewski, V. G.; Dapprich, S.; Daniels, A. D.; Strain, M. C.; Farkas, O.; Malick, D. K.; Rabuck, A. D.; Raghavachari, K.; Foresman, J. B.; Ortiz, J. V.; Cui, Q.; Baboul, A. G.; Clifford, S.; Cioslowski, J.; Stefanov, B. B.; Liu, G.; Liashenko, A.; Piskorz, P.; Komaromi, I.; Martin, R. L.; Fox, D. J.; Keith, T.; Al-Laham, M. A.; Peng, C. Y.; Nanayakkara, A.; Challacombe, M.; Gill, P. M. W.; Johnson, B.; Chen, W.; Wong, M. W.; Gonzalez, C.; and Pople, J. A.; *Gaussian 03, Revision B.02*; Gaussian, Inc.: Wallingford, CT, 2004.

## Reference 50

Frisch, M. J.; Trucks, G. W.; Schlegel, H. B.; Scuseria, G. E.; Robb, M. A.; Cheeseman, J. R.; Scalmani, G.; Barone, V.; Mennucci, B.; Petersson, G. A.; Nakatsuji, H.; Caricato, M.; Li, X.; Hratchian, H. P.; Izmaylov, A. F.; Bloino, J.; Zheng, G.; Sonnenberg, J. L.; Hada, M.; Ehara, M.; Toyota, K.; Fukuda, R.; Hasegawa, J.; Ishida, M.; Nakajima, T.; Honda, Y.; Kitao, O.; Nakai, H.; Vreven, T.; Montgomery, Jr., J. A.; Peralta, J. E.; Ogliaro, F.; Bearpark, M.; Heyd, J. J.; Brothers, E.; Kudin, K. N.; Staroverov, V. N.; Kobayashi, R.; Normand, J.; Raghavachari, K.; Rendell, A.; Burant, J. C.; Iyengar, S. S.; Tomasi, J.; Cossi, M.; Rega, N.; Millam, J. M.; Klene, M.; Knox, J. E.; Cross, J. B.; Bakken, V.; Adamo, C.; Jaramillo, J.; Gomperts, R.; Stratmann, R. E.; Yazyev, O.; Austin, A. J.; Cammi, R.; Pomelli, C.; Ochterski, J. W.; Martin, R. L.; Morokuma, K.; Zakrzewski, V. G.; Voth, G. A.; Salvador, P.; Dannenberg, J. J.; Dapprich, S.; Daniels, A. D.; Farkas, Ö.; Foresman, J. B.; Ortiz, J. V.; Cioslowski, J.; Fox, D. J. *Gaussian 09, Revision B.1*; Gaussian, Inc.: Wallingford CT, 2009.
